# Supplementary material for: Expression of several Phytophthora cinnamomi putative RxLRs provides evidence for virulence roles in avocado
Source: PLoS One. 2021 Jul 14;16(7):e0254645. doi: 10.1371/journal.pone.0254645 (PMC8279351; doi:10.1371/journal.pone.0254645)
Supplement: S1 Table — (XLSX) [file pone.0254645.s004.xlsx]

## Sheet: Non-redundant candidate RxLRs
Gene ID in GKB4	Prediction Source	Source ID	New Name (This Study)
jg16092.t1	Engelbrecht et al., 2021	jg16092.t1	PcinRxLR23a
jg7890.t1	Engelbrecht et al., 2021	jg7890.t1	PcinRxLR23c
jg260.t1	Engelbrecht et al., 2021	jg260.t1
jg17846.t1	Engelbrecht et al., 2021	jg17846.t1	PcinRxLR34b
jg6893.t1	Engelbrecht et al., 2021	jg6893.t1
jg13842.t1	Engelbrecht et al., 2021	jg13842.t1	PcinRxLR17c
jg2708.t1	Engelbrecht et al., 2021	jg2708.t1	PcinRxLR43
jg6576.t1	Engelbrecht et al., 2021	jg6576.t1
jg17529.t1	Engelbrecht et al., 2021	jg17529.t1
jg16580.t1	Engelbrecht et al., 2021	jg16580.t1
jg12330.t1	Engelbrecht et al., 2021	jg12330.t1
jg5710.t1	Engelbrecht et al., 2021	jg5710.t1
jg171.t1	Engelbrecht et al., 2021	jg171.t1	PcinRxLR30
jg4985.t1	Engelbrecht et al., 2021	jg4985.t1
jg12299.t1	Engelbrecht et al., 2021	jg12299.t1
jg4990.t1	Engelbrecht et al., 2021	jg4990.t1	PcinRxLR23b
jg15533.t1	Engelbrecht et al., 2021	jg15533.t1
jg15209.t1	Engelbrecht et al., 2021	jg15209.t1
jg4029.t1	Engelbrecht et al., 2021	jg4029.t1
jg15284.t1	Engelbrecht et al., 2021	jg15284.t1
jg4075.t1	Engelbrecht et al., 2021	jg4075.t1	PcinRxLR50
jg327.t1	Engelbrecht et al., 2021	jg327.t1
jg6571.t1	Engelbrecht et al., 2021	jg6571.t1
jg6569.t1	Engelbrecht et al., 2021	jg6569.t1
jg3951.t1	Engelbrecht et al., 2021	jg3951.t1
jg5476.t1	Engelbrecht et al., 2021	jg5476.t1
jg1571.t1	Engelbrecht et al., 2021	jg1571.t1
jg14113.t1	Engelbrecht et al., 2021	jg14113.t1	PcinRxLR67
jg9187.t1	Engelbrecht et al., 2021	jg9187.t1	PcinRxLR66
jg12236.t1	Engelbrecht et al., 2021	jg12236.t1
jg4283.t1	Engelbrecht et al., 2021	jg4283.t1
jg4285.t1	Engelbrecht et al., 2021	jg4285.t1	PcinRxLR4b
jg12238.t1	Engelbrecht et al., 2021	jg12238.t1	PcinRxLR4a
jg2385.t1	Engelbrecht et al., 2021	jg2385.t1	PcinRxLR42
jg15256.t1	Engelbrecht et al., 2021	jg15256.t1
jg4056.t1	Engelbrecht et al., 2021	jg4056.t1
jg11619.t1	Engelbrecht et al., 2021	jg11619.t1	PcinRxLR60
jg15235.t1	Engelbrecht et al., 2021	jg15235.t1
jg4052.t1	Engelbrecht et al., 2021	jg4052.t1
jg4083.t1	Engelbrecht et al., 2021	jg4083.t1	PcinRxLR15
jg13489.t1	Engelbrecht et al., 2021	jg13489.t1	PcinRxLR8a
jg10362.t1	Engelbrecht et al., 2021	jg10362.t1
jg191.t1	Engelbrecht et al., 2021	jg191.t1
jg16977.t1	Engelbrecht et al., 2021	jg16977.t1
jg10067.t1	Engelbrecht et al., 2021	jg10067.t1
jg10068.t1	Engelbrecht et al., 2021	jg10068.t1
jg2772.t1	Engelbrecht et al., 2021	jg2772.t1
jg15898.t1	Engelbrecht et al., 2021	jg15898.t1
jg1579.t1	Engelbrecht et al., 2021	jg1579.t1
jg11299.t1	Engelbrecht et al., 2021	jg11299.t1
jg1663.t1	Engelbrecht et al., 2021	jg1663.t1
jg2638.t1	Engelbrecht et al., 2021	jg2638.t1
jg2076.t1	Engelbrecht et al., 2021	jg2076.t1
jg12947.t1	Engelbrecht et al., 2021	jg12947.t1
jg12963.t1	Engelbrecht et al., 2021	jg12963.t1	PcinRxLR7
jg16778.t1	Engelbrecht et al., 2021	jg16778.t1
jg14189.t1	Engelbrecht et al., 2021	jg14189.t1
jg16078.t1	Engelbrecht et al., 2021	jg16078.t1
jg15888.t1	Engelbrecht et al., 2021	jg15888.t1
jg17862.t1	Engelbrecht et al., 2021	jg17862.t1
jg6742.t1	Engelbrecht et al., 2021	jg6742.t1
jg6746.t1	Engelbrecht et al., 2021	jg6746.t1
jg6749.t1	Engelbrecht et al., 2021	jg6749.t1
jg3714.t1	Engelbrecht et al., 2021	jg3714.t1
jg11663.t1	Engelbrecht et al., 2021	jg11663.t1
jg16635.t1	Engelbrecht et al., 2021	jg16635.t1	PcinRxLR26a
jg13719.t1	Engelbrecht et al., 2021	jg13719.t1
jg19133.t1	Engelbrecht et al., 2021	jg19133.t1	PcinRxLR38
jg15182.t1	Engelbrecht et al., 2021	jg15182.t1	PcinRxLR47
jg11125.t1	Engelbrecht et al., 2021	jg11125.t1
jg13198.t1	Engelbrecht et al., 2021	jg13198.t1
jg1550.t1	Engelbrecht et al., 2021	jg1550.t1
jg16082.t1	Engelbrecht et al., 2021	jg16082.t1
jg18784.t1	Engelbrecht et al., 2021	jg18784.t1
jg1103.t1	Engelbrecht et al., 2021	jg1103.t1	PcinRxLR34a
jg13945.t1	Engelbrecht et al., 2021	jg13945.t1	PcinRxLR12a
jg8081.t1	Engelbrecht et al., 2021	jg8081.t1
jg8080.t1	Engelbrecht et al., 2021	jg8080.t1
jg9219.t1	Engelbrecht et al., 2021	jg9219.t1
jg9221.t1	Engelbrecht et al., 2021	jg9221.t1
jg2882.t1	Engelbrecht et al., 2021	jg2882.t1
jg5559.t1	Engelbrecht et al., 2021	jg5559.t1	PcinRxLR35
jg10850.t1	Engelbrecht et al., 2021	jg10850.t1
jg5836.t1	Engelbrecht et al., 2021	jg5836.t1
jg173.t1	Engelbrecht et al., 2021	jg173.t1
jg14299.t1	Engelbrecht et al., 2021	jg14299.t1
jg18576.t1	Engelbrecht et al., 2021	jg18576.t1
jg11301.t1	Engelbrecht et al., 2021	jg11301.t1
jg3371.t1	Engelbrecht et al., 2021	jg3371.t1	PcinRxLR17b
jg1559.t1	Engelbrecht et al., 2021	jg1559.t1	PcinRxLR17a
jg19102.t1	Engelbrecht et al., 2021	jg19102.t1
jg1573.t1	Engelbrecht et al., 2021	jg1573.t1
jg11827.t1	Engelbrecht et al., 2021	jg11827.t1
jg13848.t1	Engelbrecht et al., 2021	jg13848.t1
jg281.t1	Engelbrecht et al., 2021	jg281.t1
jg1552.t1	Engelbrecht et al., 2021	jg1552.t1
jg4060.t1	Engelbrecht et al., 2021	jg4060.t1
jg15208.t1	Engelbrecht et al., 2021	jg15208.t1
jg15537.t1	Engelbrecht et al., 2021	jg15537.t1
jg10059.t1	Engelbrecht et al., 2021	jg10059.t1
jg2403.t1	Engelbrecht et al., 2021	jg2403.t1
jg3967.t1	Engelbrecht et al., 2021	jg3967.t1
jg7199.t1	Engelbrecht et al., 2021	jg7199.t1
jg15556.t1	Engelbrecht et al., 2021	jg15556.t1
jg4519.t1	Engelbrecht et al., 2021	jg4519.t1
jg104.t1	Engelbrecht et al., 2021	jg104.t1
jg4064.t1	Engelbrecht et al., 2021	jg4064.t1
jg10438.t1	Engelbrecht et al., 2021	jg10438.t1
jg10378.t1	Engelbrecht et al., 2021	jg10378.t1	PcinRxLR8b
jg184.t1	Engelbrecht et al., 2021	jg184.t1	PcinRxLR36a
jg5825.t1	Engelbrecht et al., 2021	jg5825.t1	PcinRxLR36b
jg14186.t1	Engelbrecht et al., 2021	jg14186.t1
jg15884.t1	Engelbrecht et al., 2021	jg15884.t1
jg4077.t1	Engelbrecht et al., 2021	jg4077.t1
jg631.t1	Engelbrecht et al., 2021	jg631.t1
jg12235.t1	Engelbrecht et al., 2021	jg12235.t1
jg16037.t1	Engelbrecht et al., 2021	jg16037.t1	PcinRxLR21
jg7892.t1	Engelbrecht et al., 2021	jg7892.t1
jg4991.t1	Engelbrecht et al., 2021	jg4991.t1
jg6661.t1	Engelbrecht et al., 2021	jg6661.t1
jg2149.t1	Engelbrecht et al., 2021	jg2149.t1
jg10866.t1	Engelbrecht et al., 2021	jg10866.t1	PcinRxLR62
jg4237.t1	Engelbrecht et al., 2021	jg4237.t1	PcinRxLR65
jg4987.t1	Engelbrecht et al., 2021	jg4987.t1
jg13718.t1	Engelbrecht et al., 2021	jg13718.t1	PcinRxLR10
jg2077.t1	Engelbrecht et al., 2021	jg2077.t1
jg15384.t1	Engelbrecht et al., 2021	jg15384.t1
jg12057.t1	Engelbrecht et al., 2021	jg12057.t1
jg6706.t1	Engelbrecht et al., 2021	jg6706.t1
jg19623.t1	Engelbrecht et al., 2021	jg19623.t1
jg8277.t1	Engelbrecht et al., 2021	jg8277.t1
jg371.t1	Engelbrecht et al., 2021	jg371.t1
jg17626.t1	Engelbrecht et al., 2021	jg17626.t1	PcinRxLR69a
jg10431.t1	Engelbrecht et al., 2021	jg10431.t1	PcinRxLR69b
jg13020.t1	Engelbrecht et al., 2021	jg13020.t1	PcinRxLR69c
jg3373.t1	Engelbrecht et al., 2021	jg3373.t1
jg3405.t1	Engelbrecht et al., 2021	jg3405.t1
jg8301.t1	Engelbrecht et al., 2021	jg8301.t1
jg9554.t1	Engelbrecht et al., 2021	jg9554.t1
jg1979.t1	Engelbrecht et al., 2021	jg1979.t1
jg15386.t1	Engelbrecht et al., 2021	jg15386.t1
jg17347.t1	Engelbrecht et al., 2021	jg17347.t1
jg12429.t1	Engelbrecht et al., 2021	jg12429.t1	PcinRxLR5a
jg718.t1	Engelbrecht et al., 2021	jg12429.t1	PcinRxLR5b
jg12607.t1	Engelbrecht et al., 2021	jg12607.t1
jg17665.t1	Engelbrecht et al., 2021	jg17665.t1	PcinRxLR32
jg2706.t1	Engelbrecht et al., 2021	jg2706.t1
jg4504.t1	Engelbrecht et al., 2021	jg4504.t1
jg5069.t1	Engelbrecht et al., 2021	jg5069.t1
jg9436.t1	Engelbrecht et al., 2021	jg9436.t1	PcinRxLR71
jg5440.t1	Engelbrecht et al., 2021	jg5440.t1
jg17913.t1	Engelbrecht et al., 2021	jg17913.t1
jg17911.t1	Engelbrecht et al., 2021	jg17911.t1
jg17642.t1	Engelbrecht et al., 2021	jg17642.t1
jg17912.t1	Engelbrecht et al., 2021	jg17912.t1
jg17910.t1	Engelbrecht et al., 2021	jg17910.t1
jg17909.t1	Engelbrecht et al., 2021	jg17909.t1
jg15903.t1	Engelbrecht et al., 2021	jg15903.t1
jg10300.t1	Engelbrecht et al., 2021	jg10300.t1
jg2705.t1	Engelbrecht et al., 2021	jg2705.t1
jg2166.t1	Engelbrecht et al., 2021	jg2166.t1
jg2862.t1	Engelbrecht et al., 2021	jg2862.t1
jg11486.t1	Engelbrecht et al., 2021	jg11486.t1
jg8159.t2	Engelbrecht et al., 2021	jg8159.t2	PcinRxLR56
jg8158.t1	Engelbrecht et al., 2021	jg8158.t1	PcinRxLR57
jg2452.t1	Engelbrecht et al., 2021	jg2452.t1
jg19359.t1	Engelbrecht et al., 2021	jg19359.t1
jg6559.t1	McGowan & Fitzpatrick, 2017	PHCI|01367
jg6560.t1	McGowan & Fitzpatrick, 2017	PHCI|01368
jg3474.t1	McGowan & Fitzpatrick, 2017	PHCI|02097
jg12167.t1	McGowan & Fitzpatrick, 2017	PHCI|03980
jg12168.t1	McGowan & Fitzpatrick, 2017	PHCI|03981
jg15768.t1	McGowan & Fitzpatrick, 2017	PHCI|06174
jg13301.t1	McGowan & Fitzpatrick, 2017	PHCI|06657; PHCI|12925
jg7448.t1	McGowan & Fitzpatrick, 2017	PHCI|06866
jg4471.t1	McGowan & Fitzpatrick, 2017	PHCI|09996
jg18572.t1	McGowan & Fitzpatrick, 2017	PHCI|01078
jg16765.t2	McGowan & Fitzpatrick, 2017	PHCI|05565	PcinRxLR29
jg17348.t1	McGowan & Fitzpatrick, 2017	PHCI|06762
jg17355.t1	McGowan & Fitzpatrick, 2017	PHCI|06766
jg9570.t1	McGowan & Fitzpatrick, 2017	PHCI|10680
jg15900.t1	McGowan & Fitzpatrick, 2017	PHCI|11167
jg6605.t1	McGowan & Fitzpatrick, 2017	PHCI|11241
jg6614.t1	McGowan & Fitzpatrick, 2017	PHCI|12267
jg44.t1	McGowan & Fitzpatrick, 2017	PHCI|12502
jg12814.t1	Reitmann et al., 2017	jgi|Phyci1|80513|
jg2033.t1	Reitmann et al., 2017	jgi|Phyci1|83483|
jg10392.t1	Reitmann et al., 2017	jgi|Phyci1|86540|
jg17793.t1	Reitmann et al., 2017	jgi|Phyci1|172110|	PcinRxLR64
jg11973.t1	Reitmann et al., 2017	jgi|Phyci1|292291|
jg4255a	Hardham & Blackman, 2018	Phyci1_24296: Phyci1_297058	PcinRxLR68b
jg4255b	Hardham & Blackman, 2018	Phyci1_24296: Phyci1_297058	PcinRxLR68c
jg16299.t1	Hardham & Blackman, 2018	Phyci1_87160
jg299.t1	Pipeline adapted from Win et al., 2007	Phyci1_97951	PcinRxLR45
jg4663.t1	Pipeline adapted from Win et al., 2007	Phyci1_72406
jg19254.t1	Pipeline adapted from Win et al., 2007	Phyci1_100005	PcinRxLR72
jg8673.t1	Pipeline adapted from Win et al., 2007	Phyci1_100098
jg4046.t1	Pipeline adapted from Win et al., 2007	Phyci1_113704
jg1568.t1	Pipeline adapted from Win et al., 2007	Phyci1_114318
jg15126.t1	Pipeline adapted from Win et al., 2007	Phyci1_131231
jg42.t1	Pipeline adapted from Win et al., 2008	Phyci1_142664	PcinRxLR51
jg9388.t1	Pipeline adapted from Win et al., 2007	Phyci1_178772
jg13583.t1	Pipeline adapted from Win et al., 2007	Phyci1_21439; Phyci1_78494
jg4025.t2	Pipeline adapted from Win et al., 2007	Phyci1_216845
jg9706	Pipeline adapted from Win et al., 2007	Phyci1_220060
jg7968.t1	Pipeline adapted from Win et al., 2007	Phyci1_22058
jg19514.t1	Pipeline adapted from Win et al., 2007	Phyci1_240765
jg16036.t2	Pipeline adapted from Win et al., 2007	Phyci1_246465
jg6034.t1	Pipeline adapted from Win et al., 2007	Phyci1_255354
jg11652.t1	Pipeline adapted from Win et al., 2007	Phyci1_255366
jg3713.t1	Pipeline adapted from Win et al., 2007	Phyci1_31697
jg9379.t1	Pipeline adapted from Win et al., 2007	Phyci1_32109
jg912.t1	Pipeline adapted from Win et al., 2007	Phyci1_381040
jg4062.t1	Pipeline adapted from Win et al., 2007	Phyci1_442306
jg12003.t2	Pipeline adapted from Win et al., 2007	Phyci1_566358
jg1583.t1	Pipeline adapted from Win et al., 2007	Phyci1_568947
jg13013.t1	Pipeline adapted from Win et al., 2007	Phyci1_575072
jg9352.t1	Pipeline adapted from Win et al., 2007	Phyci1_587572
jg19014.t1	Pipeline adapted from Win et al., 2007	Phyci1_62430
jg1599.t1	Pipeline adapted from Win et al., 2007	Phyci1_64536
jg1562.t1	Pipeline adapted from Win et al., 2007	Phyci1_64571
jg4965.t1	Pipeline adapted from Win et al., 2007	Phyci1_6715
jg11556.t1	Pipeline adapted from Win et al., 2007	Phyci1_70895; Phyci1_85009	PcinRxLR1b
jg15230.t1	Pipeline adapted from Win et al., 2007	Phyci1_72253
jg4284.t1	Pipeline adapted from Win et al., 2007	Phyci1_81992
jg6574.t1	Pipeline adapted from Win et al., 2007	Phyci1_84914
jg12952.t1	Pipeline adapted from Win et al., 2007	Phyci1_88241
jg4251a	Pipeline adapted from Win et al., 2007	Phyci1_97451; Phyci1_97937	PcinRxLR52a
jg4251b	Pipeline adapted from Win et al., 2007	Phyci1_97451; Phyci1_97937	PcinRxLR52b
jg2175.t1	Pipeline adapted from Win et al., 2007	Phyci1_9950
jg1328.t1	Pipeline adapted from Win et al., 2007	Phyci1_227166; Phyci1_227271
jg13758.t1	Pipeline adapted from Win et al., 2007	Phyci1_248857
jg12595.t1	Pipeline adapted from Win et al., 2007	Phyci1_6670
jg14161.t1	Pipeline adapted from Win et al., 2007	Phyci1_70517
jg15774.t1	Pipeline adapted from Win et al., 2007	Phyci1_90101	PcinRxLR19
jg11549.t1	Pipeline adapted from Win et al., 2007	Phyci1_70895	PcinRxLR1a
mg00001	Manual annotation based on similarity to jg13945.t1	jg13945.t1	PcinRxLR12b
mg00002	Manual annotation based on similarity to jg16635.t1	jg16635.t1	PcinRxLR26b
mg00003	Manual annotation based on similarity to jg17642.t1	jg17642.t1	PcinRxLR31a
mg00004	Manual annotation based on similarity to jg17642.t1	jg17642.t1	PcinRxLR31c
mg00005	Manual annotation based on similarity to jg17642.t1	jg17642.t1	PcinRxLR31b
mg00006	Manual annotation based on similarity to jg11219.t1	jg11219.t1	PcinRxLR59
mg00007	Manual annotation based on similarity to Phyci1_24296	Phyci1_24296	PcinRxLR68a
mg00008	Manual annotation based on similarity to Phyci1_80229	Phyci1_80229	PcinRxLR70
