# Supplementary material for: Expression of several Phytophthora cinnamomi putative RxLRs provides evidence for virulence roles in avocado
Source: PLoS One. 2021 Jul 14;16(7):e0254645. doi: 10.1371/journal.pone.0254645 (PMC8279351; doi:10.1371/journal.pone.0254645)
Supplement: S3 Table — (XLSX) [file pone.0254645.s006.xlsx]

## Sheet: Genome coordinates - GKB4 hits
				Custom BLAST Hit to GKB4 Genome
GKB4 Gene ID	New Pcin Gene ID	Final Pcin Gene ID		% Grade*	E-value	Contig	Hit Start Site	Hit End Site
jg11549	PcinRxLR1a	PcinRxLR1a		100	3.06e-125	39	297150	297728
	PcinRxLR2a	PcinRxLR1b		90.4	7.41e-100	39	337099	336524
	No reads	N/A		88.3	1.02e-83	39	318756	318181
jg11556	PcinRxLR2a	PcinRxLR1b		100	1.61e-128	39	337099	336506
	PcinRxLR1a	PcinRxLR1a		90.4	2.58e-101	39	297150	297743
	No reads	N/A		89.6	4.18e-90	39	318756	318163
jg11652	PcinRxLR3	N/A		100	0	39	943824	944657
jg12057	No reads	N/A		100	6.69e-77	106	213045	213407
jg12238	PcinRxLR4a	PcinRxLR4a		100	2.31e-88	71	499453	499863
	PcinRxLR4b	PcinRxLR4b		100	2.32e-88	50	335099	335509
jg12429	PcinRxLR5a	PcinRxLR5a		100	0	57	256905	257885
	PcinRxLR5b	PcinRxLR5b		99.4	0	109	87188	88168
jg12947	PcinRxLR6a	N/A		100	0	102	1041476	1040619
	No reads	N/A		87.7	6.25e-129	17	2061472	2062347
	No reads	N/A		83.6	5.24e-120	102	1092495	1093379
	PcinRxLR7a	PcinRxLR7		72.7	1.45e-89	102	1157751	1158287
jg12963	PcinRxLR7a	PcinRxLR7		100	3.36e-98	102	1157751	1158221
	PcinRxLR6a	N/A		91	1.57e-80	102	1041476	1041009
	No reads	N/A		90.9	1.99e-79	17	2061472	2061930
	No reads	N/A		86.5	9.97e-68	102	1092495	1092962
jg13489	PcinRxLR8a	PcinRxLR8a		100	0	33	803312	804286
	PcinRxLR8b	PcinRxLR8b		88.9	4.64e-161	9	716590	717534
	No reads	N/A		87.5	5.85e-149	70	346254	347228
	PcinRxLR8c	N/A		80.2	4.8e-126	9	902961	903863
jg13583	PcinRxLR9a	N/A		71	3.52e-72	33	1142939	1142508
	No reads	N/A		70.8	1.13e-84	87	336221	335601
	PcinRxLR9b	N/A		69.3	6.55e-69	33	1147936	1147577
jg13718	PcinRxLR10a	PcinRxLR10		100	6.43e-91	8	395630	395190
	PcinRxLR10b	N/A		98	7.91e-86	93	33864	34304
jg13848	PcinRxLR11a	N/A		100	1.36e-76	17	57212	56844
	Not an RxLR	N/A		89.7	1.4e-61	36	153365	153694
jg13945	PcinRxLR12a	PcinRxLR12a		100	3.51e-118	17	532437	532988
	PcinRxLR12b	PcinRxLR12b		97.3	4.46e-109	2	1034853	1035407
	No reads	N/A		90.3	1.77e-91	17	549465	548968
jg14299	PcinRxLR13	N/A		100	3e-136	45	560339	559713
jg15126	Not valid RxLR	N/A		100	0	18	275319	276758
jg15230	PcinRxLR14	N/A		100	2.63e-83	21	215321	215713
jg15256	Not valid RxLR	N/A		100	0	21	492450	493592
	Not valid RxLR	N/A		85.9	0	70	304318	303224
	No reads	N/A		84.3	1.21e-180	19	726682	725408
	No reads	N/A		83	3.74e-180	19	860627	861814
	PcinRxLR15	PcinRxLR15		81.3	3.47e-170	19	1108697	1107429
jg15537	Not valid RxLR	N/A		100	0	21	2661859	2658854
	PcinRxLR16	N/A		71.5	0	48	18829	17087
jg1559	PcinRxLR17a/b	PcinRxLR17a		95.4	7.81e-93	36	175399	174953
	PcinRxLR18a/b	PcinRxLR17b		86.6	1.56e-71	5	110563	110117
	PcinRxLR17c	PcinRxLR17c		80.5	2.37e-70	17	5302	5604
jg15774	PcinRxLR19	PcinRxLR19		100	2.04e-149	62	731632	730949
jg1599.t1	PcinRxLR20a	N/A		94.5	1.13e-155	36	485241	485942
	PcinRxLR20b	N/A		92.6	1.43e-149	61	391735	391034
jg1599.t2	PcinRxLR20a	N/A		94.8	5.49e-158	36	485241	485993
	PcinRxLR20b	N/A		93	1.15e-151	61	391735	390983
jg16036.t1	Not valid RxLR	N/A		98.6	0	83	596614	591278
jg16036.t2	Not valid RxLR	N/A		100	0	83	596689	590675
jg16037	PcinRxLR21	PcinRxLR21		100	1.07e-82	83	597248	596853
jg16078	PcinRxLR22a	N/A		100	6.22e-77	83	774188	773811
	No reads	N/A		86	4.2e-46	11	590946	591242
jg16092	PcinRxLR23a	PcinRxLR23a		100	1.81e-108	111	32228	32740
	PcinRxLR24a	PcinRxLR23b		95	6.28e-98	91	78358	77846
	PcinRxLR25a	PcinRxLR23c		94.7	2.26e-96	53	3420698	3420186
	No reads	N/A		91.5	6.32e-90	91	10123	9641
jg16635	PcinRxLR26a	PcinRxLR26a		100	7.29e-107	120	96304	96822
	PcinRxLR27a	PcinRxLR26b		78.9	6.79e-55	68	59649	59350
jg16653.t1	PcinRxLR28a	N/A		93.5	7.88e-83	120	162769	163188
	No reads	N/A		86.7	7.68e-71	68	25345	25713
jg16653.t2	PcinRxLR28a	N/A		100	3.64e-103	120	162769	163251
	No reads	N/A		84.1	6e-71	68	25345	25713
	No reads	N/A		71.6	4.89e-36	53	1146085	1146537
jg16765.t1	PcinRxLR29a	N/A		84.3	2.47e-168	120	582087	582854
	PcinRxLR29b	PcinRxLR29		62.3	6.5e-57	120	583176	583580
jg16765.t2	PcinRxLR29b	PcinRxLR29		100	6.62e-81	120	583182	583580
jg171	PcinRxLR30a	PcinRxLR30		85.8	3.2e-69	76	22702	22184
	PcinRxLR30b	N/A		72.2	1.63e-45	24	129271	129516
jg17642	PcinRxLR31a	N/A		100	6.04e-106	2	48213	48716
	PcinRxLR31b	PcinRxLR31b		96.1	8.32e-97	2	109604	109101
	PcinRxLR31c	PcinRxLR31c		95.5	8.64e-95	2	120348	119845
	PcinRxLR31d	PcinRxLR31a		95.2	1.86e-92	2	70565	70062
	No reads	N/A		89.9	1.06e-80	27	572423	572926
	No reads	N/A		88.3	1.7e-77	27	580673	581158
jg17665	PcinRxLR32a	PcinRxLR32		100	0	2	159202	157733
	PcinRxLR33a	N/A		76.1	0	53	257190	258446
jg17846	PcinRxLR34a	PcinRxLR34a		83.2	6.51e-67	35	678770	679204
	PcinRxLR34b	PcinRxLR34b		75.6	5.7e-39	12	16659	16357
	PcinRxLR35a	PcinRxLR35		69.2	5.35e-32	49	397332	397766
jg184	PcinRxLR36a	PcinRxLR36a		100	1.4e-115	76	102813	102259
	PcinRxLR36b	PcinRxLR36b		99.7	3.87e-115	24	43405	43959
jg19014	PcinRxLR37a/b	N/A		84.5	0	92	1539249	1537528
jg19133	PcinRxLR38a	PcinRxLR38		100	5.88e-100	92	2062248	2061781
	No reads	N/A		88.2	3.72e-72	42	239531	239905
jg19359	PcinRxLR39	N/A		100	2.07e-119	3	46232	46777
jg19514	PcinRxLR40	N/A		100	1.74e-64	3	923090	922782
jg2077	PcinRxLR10b	N/A		100	3.35e-92	93	33864	34304
	PcinRxLR10a	PcinRxLR10		98	1.57e-85	8	395630	395190
jg2264	PcinRxLR41a	N/A		91	0	40	633303	634481
	PcinRxLR41b	N/A		90.5	0	54	502475	501294
jg2385	PcinRxLR42	PcinRxLR42		100	0	41	580978	581937
jg2708	PcinRxLR43	PcinRxLR43		100	8.78e-127	85	157423	158001
jg2882	PcinRxLR44a	N/A		100	2.05e-111	126	469290	469802
	Not valid RxLR	N/A		87.5	2.93e-74	15	54959	55510
	Not valid RxLR	N/A		87.5	2.93e-74	15	66185	66736
	Not valid RxLR	N/A		87	1.67e-72	132	129293	129844
	Not valid RxLR	N/A		87	1.67e-72	132	133315	133866
jg299	PcinRxLR45a	PcinRxLR45		89.8	0	64	240041	243292
jg3371	PcinRxLR18a/b	PcinRxLR17b		74.2	4.22e-90	5	110563	110105
	No reads	N/A		74	1.54e-85	5	88326	87901
jg3713	PcinRxLR46a	N/A		100	6.42e-103	18	475874	475392
	PcinRxLR46b	N/A		100	1.29e-102	51	29569	29087
	PcinRxLR46c	N/A		98.4	6.95e-99	18	235420	235899
jg3714	Not valid RxLR	N/A		100	0	51	30600	29749
	Not valid RxLR	N/A		92.3	7.8e-157	18	234384	235238
	PcinRxLR47	PcinRxLR48		79.4	7.84e-97	18	476901	476074
jg4025.t1	PcinRxLR48	N/A		97.2	7.41e-58	19	429399	429701
jg4062	PcinRxLR49	N/A		82.7	2.64e-121	19	839982	839227
jg4075	PcinRxLR50	PcinRxLR50		100	0	19	1028443	1027064
jg42	PcinRxLR51a	PcinRxLR51		100	0	75	69846	67102
	Not valid RxLR	N/A		96.9	0	75	128388	125644
jg4251	PcinRxLR52a/b	PcinRxLR52a; PcinRxLR52b		55-71**	**	50	178027	183601
jg4285	PcinRxLR4a	PcinRxLR4a		100	2.31e-88	71	499453	499863
	PcinRxLR4b	PcinRxLR4b		100	2.32e-88	50	335099	335509
jg44	Not valid RxLR	N/A		100	0	75	128388	125644
	PcinRxLR51a	PcinRxLR51		96.9	0	75	69846	67102
jg4990	PcinRxLR24a	PcinRxLR23b		100	1.78e-108	91	78358	77846
	PcinRxLR25a	PcinRxLR23c		99.7	5.73e-107	53	3420698	3420186
	PcinRxLR23a	PcinRxLR23a		95	6.67e-98	111	32228	32740
	No reads	N/A		92.1	1.59e-90	91	10123	9641
jg5559	PcinRxLR35a	PcinRxLR35		100	5.62e-101	49	397293	397769
	PcinRxLR34a	PcinRxLR34a		73.7	5.4e-50	35	678770	679198
jg6559	PcinRxLR53a	N/A		100	0	0	1042630	1041080
	PcinRxLR54a	N/A		86	0	0	1044925	1043303
	No reads	N/A		78.6	0	0	1047519	1046134
jg6560	PcinRxLR54a	N/A		74	0	0	1044997	1043303
	No reads	N/A		70.6	0	0	1047522	1046134
	PcinRxLR53a	N/A		62.4	0	0	1042579	1041080
jg6605	PcinRxLR55	N/A		100	3.86e-144	0	1583845	1583186
jg7890	PcinRxLR25a	PcinRxLR23c		100	2.1e-108	53	3420698	3420186
	PcinRxLR24a	PcinRxLR23b		99.7	5.15e-107	91	78358	77846
	PcinRxLR23a	PcinRxLR23a		94.7	2.06e-96	111	32228	32740
	No reads	N/A		91.8	1.93e-89	91	10123	9641
jg8159.t1	PcinRxLR56a	PcinRxLR56		100	4.78e-40	60	119944	120144
jg8159.t2	PcinRxLR56a	PcinRxLR56		100	2.46e-95	60	119944	120144
	PcinRxLR57a	PcinRxLR57		72.4	1.04e-21	60	116987	117406
jg9706	PcinRxLR58a	N/A		61-62**	**	14	1712883	1757383
	No reads	N/A		56	8.97e-40	119	618267	617716
jg1103	PcinRxLR34a	PcinRxLR34a		100	9.81e-105	35	678722	679204
	PcinRxLR34b	PcinRxLR34b		75	9.42e-53	12	16659	16327
	PcinRxLR35a	PcinRxLR35		74.5	3.27e-50	49	397332	397766
jg11299	PcinRxLR59a	N/A		100	2.07e-97	7	649840	649376
	PcinRxLR59b	PcinRxLR59		94.2	2.73e-83	75	296598	296143
jg11619	PcinRxLR60a	PcinRxLR60		88.4	4.15e-162	39	783027	783761
	Not valid RxLR	N/A		75	3.19e-63	63	508513	509574
	PcinRxLR61a	N/A		70.7	1.33e-57	63	582728	581793
jg10866	PcinRxLR62	PcinRxLR63		100	3.4e-120	25	477185	476625
jg15284	PcinRxLR63a	N/A		99.8	0	21	577854	579215
	Not valid RxLR	N/A		92.4	0	21	573133	571802
jg17793	PcinRxLR64	PcinRxLR65		100	1.56e-67	2	977412	977086
jg19102	No reads	N/A		100	2.49e-106	92	1892489	1892980
jg19623	No reads	N/A		100	1.59e-97	26	253378	252908
	No reads	N/A		96.8	4.27e-80	7	833836	833366
jg4237	PcinRxLR65	PcinRxLR66		100	6.28e-91	50	148961	148476
jg9187	PcinRxLR66a	PcinRxLR66		100	4.85e-88	70	242324	242755
	PcinRxLR67	PcinRxLR68		81.6	1.22e-46	17	1538498	1538917
*The grade provided by Custom BLAST is the weighted score for the hit based on the pairwise identity, coverage and E-value. Pairwise identity and query coverage are not shown in this table.
**Multiple hits to the GKB4 genome by different fragments of the gene. Each fragment had a hit with a different E-value
