# Supplementary material for: Expression of several Phytophthora cinnamomi putative RxLRs provides evidence for virulence roles in avocado
Source: PLoS One. 2021 Jul 14;16(7):e0254645. doi: 10.1371/journal.pone.0254645 (PMC8279351; doi:10.1371/journal.pone.0254645)
Supplement: S5 Table — (XLSX) [file pone.0254645.s008.xlsx]

## Sheet: PcinRxLR expression in avocado
		Normalised read count in mycelia	12 hpi vs. mycelia		24 hpi vs. mycelia		120 hpi vs. mycelia
GKB4 Gene ID	New Pcin Gene ID	Base Mean	Fold Change	padj	Fold Change	padj	Fold Change	padj
jg11549	PcinRxLR1a	47.8865	4.87992	0.0176006	6.39567	0.000194254	1.0108	0.603859
jg11556	PcinRxLR1b	NA	NA	NA	NA	NA	NA	NA
jg12238	PcinRxLR4a	0.126988	4.94419	NA	4.43127	NA	0.807012	NA
jg4285	PcinRxLR4b	0.14511	4.75858	NA	4.24567	NA	0.621393	NA
jg12429	PcinRxLR5a	1.20268	2.16347	NA	1.65055	NA	0.314963	0.923069
jg718	PcinRxLR5b	9.56546	2.0412	0.429781	4.87335	0.00136093	1.69667	0.244356
jg12963	PcinRxLR7	0.256362	3.92712	NA	3.4142	NA	-0.210235	NA
jg13489	PcinRxLR8a	0.645994	2.5995	NA	2.08658	NA	-1.53788	NA
jg10378	PcinRxLR8b	47.042	2.19094	0.27712	7.19886	1.61755e-27	4.61971	1.71426e-13
jg13718	PcinRxLR10	NA	NA	NA	NA	NA	NA	NA
jg13945	PcinRxLR12a	3.21733	1.76639	NA	2.25313	NA	-2.37101	0.254717
mg00001	PcinRxLR12b	1.43332	3.26288	NA	2.74995	NA	2.85648	0.199292
jg4083	PcinRxLR15	NA	NA	NA	NA	NA	NA	NA
jg1559	PcinRxLR17a	NA	NA	NA	NA	NA	NA	NA
jg13842	PcinRxLR17c	NA	NA	NA	NA	NA	NA	NA
jg3371	PcinRxLR17b	NA	NA	NA	NA	NA	NA	NA
jg15774	PcinRxLR19	NA	NA	NA	NA	NA	NA	NA
jg16037	PcinRxLR21	0.715623	2.45984	NA	1.94691	NA	-1.67755	0.53247
jg16092	PcinRxLR23a	6.44081	-0.157209	NA	0.303394	NA	-4.29462	0.00690334
jg4990	PcinRxLR23b	NA	NA	NA	NA	NA	NA	NA
jg7890	PcinRxLR23c	NA	NA	NA	NA	NA	NA	NA
jg16635	PcinRxLR26a	17.899	0.427598	0.859215	2.30441	0.00625557	-3.71409	0.0055261
mg00002	PcinRxLR26b	0.338474	3.54233	NA	3.0294	NA	-0.595054	NA
jg16765	PcinRxLR29	22.3434	0.825356	0.810717	2.88035	0.158475	1.67696	0.321424
jg171	PcinRxLR30	0.786555	2.31457	NA	1.80164	NA	-1.82284	0.375601
mg00005	PcinRxLR31b	20.1833	-1.25907	0.531554	-2.73379	0.0924241	-6.35828	8.70145e-07
mg00004	PcinRxLR31c	16.0448	0.961364	0.558038	-1.89531	0.297906	-4.55793	0.000930638
mg00003	PcinRxLR31a	16.388	-1.8773	0.355799	-2.39022	0.183845	-1.23897	0.0980532
jg17665	PcinRxLR32	NA	NA	NA	NA	NA	NA	NA
jg1103	PcinRxLR34a	23.5019	5.42053	0.00198142	1.24639	0.646208	3.03281	0.0481938
jg17846	PcinRxLR34b	NA	NA	NA	NA	NA	NA	NA
jg5559	PcinRxLR35	0.242105	4.02498	NA	3.51205	NA	-0.11243	NA
jg184	PcinRxLR36a	NA	NA	NA	NA	NA	NA	NA
jg5825	PcinRxLR36b	8.68602	0.767158	0.726456	0.245903	0.904856	-4.33205	0.00126056
jg19133	PcinRxLR38	NA	NA	NA	NA	NA	NA	NA
jg2385	PcinRxLR42	17.896	0.792716	0.817611	2.84546	0.160021	-4.30645	0.0372482
jg2708	PcinRxLR43	8.34122	5.17988	0.553259	7.82344	0.280488	1.04278	0.883282
jg299a	PcinRxLR45	52.96	-1.8696	0.415679	2.47484	0.0327672	1.69744	0.075817
jg15182	PcinRxLR47	NA	NA	NA	NA	NA	NA	NA
jg4075	PcinRxLR50	NA	NA	NA	NA	NA	NA	NA
jg42	PcinRxLR51	NA	NA	NA	NA	NA	NA	NA
jg4251b	PcinRxLR52b	65.1248	-2.80915	0.115996	-0.948606	0.469091	1.742	9.07459e-07
jg4251a	PcinRxLR52a	0.200671	4.29242	NA	3.7795	NA	0.155236	NA
jg8159	PcinRxLR56	1.16506	1.75769	NA	1.24477	NA	-2.37972	0.153705
jg8158	PcinRxLR57	11.9015	0.64379	0.800048	0.130863	0.958307	3.48941	5.97337e-07
mg00006	PcinRxLR59	3.70988	1.25821	NA	1.70545	NA	-2.87921	0.0524241
jg11619	PcinRxLR60	125.979	4.52805	0.00214205	9.26993	4.38311e-44	4.71585	1.49732e-11
jg10866	PcinRxLR62	NA	NA	NA	NA	NA	NA	NA
jg17793	PcinRxLR64	NA	NA	NA	NA	NA	NA	NA
jg4237	PcinRxLR65	NA	NA	NA	NA	NA	NA	NA
jg9187	PcinRxLR66	7.20776	9.38023	0.244193	11.0159	NA	10.6207	0.0798276
jg14113	PcinRxLR67	1.92558	5.95509	NA	5.44217	NA	6.46989	0.296051
mg00007	PcinRxLR68a	48.35	5.27512	0.532502	9.16631	0.181159	9.74063	0.0915563
jg4255a	PcinRxLR68b	83.0598	0.526742	0.883655	4.82913	0.00626083	3.91095	0.0126466
jg4255b	PcinRxLR68c	330.199	0.258322	0.937009	7.88053	1.66141e-12	5.99864	3.56168e-08
jg17626	PcinRxLR69a	31.7967	-0.908785	0.695253	-2.21158	0.264199	-2.94301	0.00634439
jg10431	PcinRxLR69b	2.63771	1.0747	NA	0.561773	NA	0.171931	0.90356
jg13020	PcinRxLR69c	144.931	-0.320304	0.761893	-0.406529	0.607095	-0.0640279	0.891243
mg00008	PcinRxLR70	11.5865	1.83127	0.347704	2.27473	0.173369	4.44155	6.10962e-24
jg9436	PcinRxLR71	639.36	5.84731	1.83421e-10	10.102	1.5233e-43	8.18033	8.95723e-30
jg19254	PcinRxLR72	727.105	6.04459	2.93755e-08	10.48	1.09086e-29	4.1792	1.92398e-05
NA = read number in sample too low for reliable statistical analysis after normalisation in DESeq2
