# Supplementary material for: Expression of several Phytophthora cinnamomi putative RxLRs provides evidence for virulence roles in avocado
Source: PLoS One. 2021 Jul 14;16(7):e0254645. doi: 10.1371/journal.pone.0254645 (PMC8279351; doi:10.1371/journal.pone.0254645)
Supplement: S6 Table — (XLSX) [file pone.0254645.s009.xlsx]

## Sheet: 28RxLR_Blast
Query Sequence	Blast Top Hit Sequence Description	Blast Top Hit Species Name	Blast Top Hit E-Value	Blast Top Hit Length	Blast Top Hit Alignment Length	Blast Top Hit Similarity	Blast Hit Accession
PcinRxLR1a	NA
PcinRxLR4a	avirulence protein 1b	Phytophthora sojae	1.4e-63	141	141	0.7872	AEK80524/XP_009532481/EGZ12148/AEK80523/AEK80522
PcinRxLR4b	avirulence protein 1b	Phytophthora sojae	1.4e-63	141	141	0.7872	AEK80524/XP_009532481/EGZ12148/AEK80523/AEK80522
PcinRxLR5a	hypothetical protein PHYSODRAFT_248639	Phytophthora sojae	0.00029	385	52	0.8654	EGZ14290/XP_009531719
PcinRxLR5b	hypothetical protein PHYSODRAFT_248639	Phytophthora sojae	1.9e-84	385	349	0.765	EGZ14290/XP_009531719
PcinRxLR7	avirulence protein 1b	Phytophthora sojae	4.8e-47	293	165	0.7091	AEK80518/EGZ12306/XP_009532639
PcinRxLR8a	hypothetical protein PHYSODRAFT_288545	Phytophthora sojae	2.1e-85	324	292	0.6575	XP_009534898/XP_009539938/EGZ04647/AEK80804/EGZ10037/AEK80805
PcinRxLR12a	hypothetical protein PHYSODRAFT_343128	Phytophthora sojae	1.2e-35	175	179	0.5866	XP_009539952/EGZ04577
PcinRxLR21	Avh448	Phytophthora sojae	6e-37	115	131	0.6718	AEK81350/AEK81351/AEK81352
PcinRxLR23a	Avirulence (Avh) protein	Phytophthora megakarya	3.7e-07	161	162	0.4877	OWZ08233
PcinRxLR26a	hypothetical protein PHYSODRAFT_286360	Phytophthora sojae	6e-42	171	156	0.6603	XP_009529451/AEK81089/AEK81088/AEK81090/EGZ15702
PcinRxLR26b	hypothetical protein PHYSODRAFT_286360	Phytophthora sojae	1.9e-13	171	84	0.6667	XP_009529451/AEK81089/AEK81088/AEK81090/EGZ15702
PcinRxLR29	secreted RxLR effector peptide protein, putative	Phytophthora infestans T30-4	6.6e-43	131	141	0.7163	XP_002909281/EEY58095
PcinRxLR30	Avh114	Phytophthora sojae	2.2e-30	198	194	0.5773	AEK80691
PcinRxLR31c_TS1	RxLR effector protein	Phytophthora megakarya	4.5e-15	146	162	0.4691	OWZ18875
PcinRxLR34a	hypothetical protein PC110_g15820	Phytophthora cactorum	3.5e-23	141	152	0.5461	RAW27786
PcinRxLR35	hypothetical protein PC110_g15820	Phytophthora cactorum	3e-08	141	122	0.5574	RAW27786
PcinRxLR36b	hypothetical protein PHYSODRAFT_285267	Phytophthora sojae	1e-69	192	190	0.7684	AEK81047/AEK81046/EGZ19337/AEK81048/XP_009522054
PcinRxLR42	Avh141	Phytophthora sojae	3.7e-138	313	316	0.7373	AEK80737/AEK80735
PcinRxLR43	hypothetical protein PHYSODRAFT_354167	Phytophthora sojae	1.9e-19	128	141	0.5532	XP_009521841/EGZ19124
PcinRxLR45	subtilisin serine protease	Phytophthora sojae	0	1208	1228	0.9039	XP_009518600/EGZ23312
PcinRxLR52a	hypothetical protein PC110_g7140	Phytophthora cactorum	6.3e-11	264	82	0.5488	RAW36597
PcinRxLR52b	hypothetical protein PC110_g7140	Phytophthora cactorum	6.3e-11	264	82	0.5488	RAW36597
PcinRxLR56	hypothetical protein PHYSODRAFT_284422	Phytophthora sojae	1.4e-42	142	153	0.6928	EGZ29354/XP_009516629/AEK81295/AEK81296/AEK81294
PcinRxLR57	hypothetical protein PHYSODRAFT_284417	Phytophthora sojae	2.3e-71	139	139	0.8705	AEK81045/EGZ29339/AEK81044/AEK81043/XP_009516614
PcinRxLR59	Avh320	Phytophthora sojae	3.7e-38	167	167	0.6168	AEK81165
PcinRxLR68b	hypothetical protein PC110_g2418	Phytophthora cactorum	2e-32	189	78	0.8333	RAW41426
PcinRxLR68c_TS1	hypothetical protein PC110_g7140	Phytophthora cactorum	2.1e-31	264	87	0.8506	RAW36597
NA = no hits to BLAST database
